# Supplementary material for: Ganoderic acid loaded nano-lipidic carriers improvise treatment of hepatocellular carcinoma
Source: PubMed Central journal article supplement (PMC6711158; doi:10.1080/10717544.2019.1606865), 2019-07-30
Supplement: IDRD_A_1606865_SM2288.pdf [file IDRD_A_1606865_SM2288.pdf]

# Zeta Potential Report

v2.3

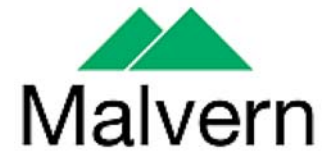

Malvern Instruments Ltd - © Copyright 2008

## Sample Details

**Sample Name:** C 1

**SOP Name:** mansettings.nano

**General Notes:**

**File Name:** Example Result3.dts      **Dispersant Name:** Water  
**Record Number:** 46      **Dispersant RI:** 1.330  
**Date and Time:** Monday, November 23, 2015 4:57...      **Viscosity (cP):** 0.8872  
**Dispersant Dielectric Constant:** 78.5

## System

**Temperature (°C):** 25.0      **Zeta Runs:** 18  
**Count Rate (kcps):** 543.5      **Measurement Position (mm):** 2.00  
**Cell Description:** Clear disposable zeta cell      **Attenuator:** 6

## Results

|                                   | Mean (mV)           | Area (%) | St Dev (mV) |
|-----------------------------------|---------------------|----------|-------------|
| <b>Zeta Potential (mV):</b> -4.99 | <b>Peak 1:</b> 0.00 | 0.0      | 0.00        |
| <b>Zeta Deviation (mV):</b> 0.00  | <b>Peak 2:</b> 0.00 | 0.0      | 0.00        |
| <b>Conductivity (mS/cm):</b> 15.3 | <b>Peak 3:</b> 0.00 | 0.0      | 0.00        |

**Result quality :** **See result quality report**

Zeta Potential Distribution

Record 46: C 1
